# Supplementary material
Source: publisher site journal article supplement (https://www.dovepress.com/article/417378)
Supplement: Supplementary file 1 [file get_supplementary_file.php]

**Supplementary materials**

**Supplementary Table 1 Quantitative analysis of three major bioactive components in the SNS by HPLC**

| **Compound** | **paeoniflorin** | **liquiritin** | **hesperidin** |
| --- | --- | --- | --- |
| Contents (mg/g) | 3.14 | 0.69 | 0.69 |

**Supplementary Table 2 Qualitative analysis of three major bioactive components**

**in the SNS by HPLC-MS**

| **Number** | **Name** | **Retention**  **(min)** | **Measured**  **(m/z)** | **chemical formula** | **chemical structure** |
| --- | --- | --- | --- | --- | --- |
| 1 | paeoniflorin | 8.31 | 525.1618 | C23H28O11 | 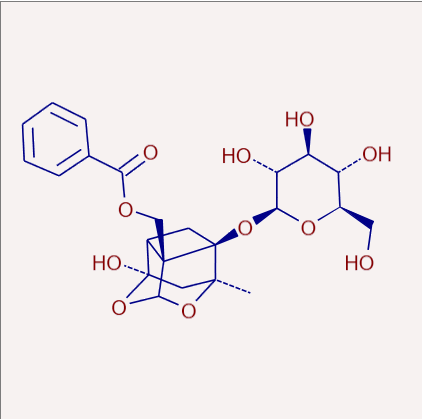 |
| 2 | liquiritin | 10.10 | 417.1196 | C21H22O9 | 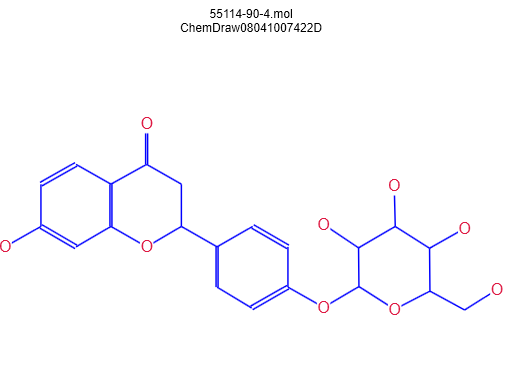 |
| 3 | hesperidin | 12.07 | 609.1830 | C28H34O15 | 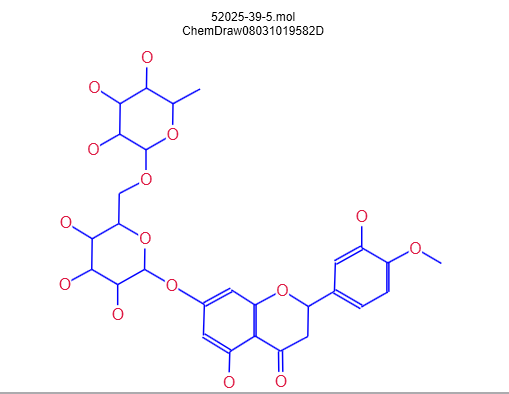 |


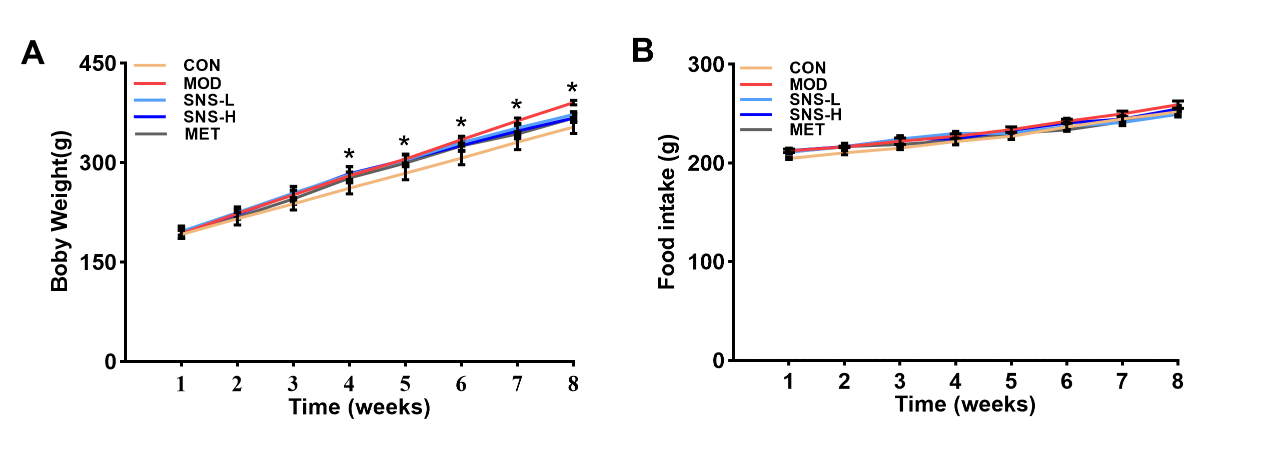


**Supplementary Figure 1** (A) The body weight was weighed once per week during the experimental period. The data are stated as the means ± SD, n = 8, * vs. CON group (*P* < 0.05). (B) The average amount of food intake in each group was recorded daily during the experimental period.


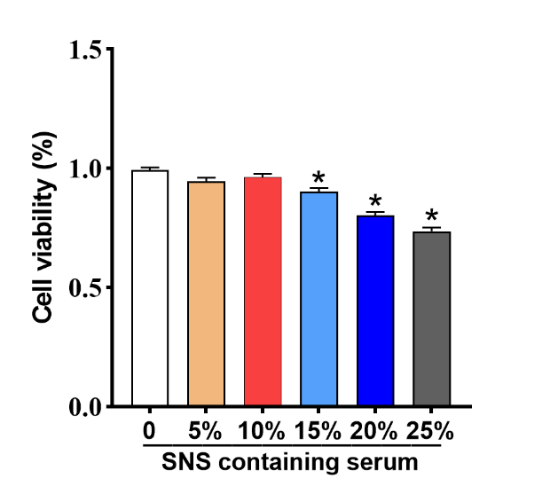


**Supplementary Figure 2** The cytotoxicity of SNS-containing serum. The data are stated as the means ± SD, n = 6, * vs. blank serum group (*P* < 0.05).


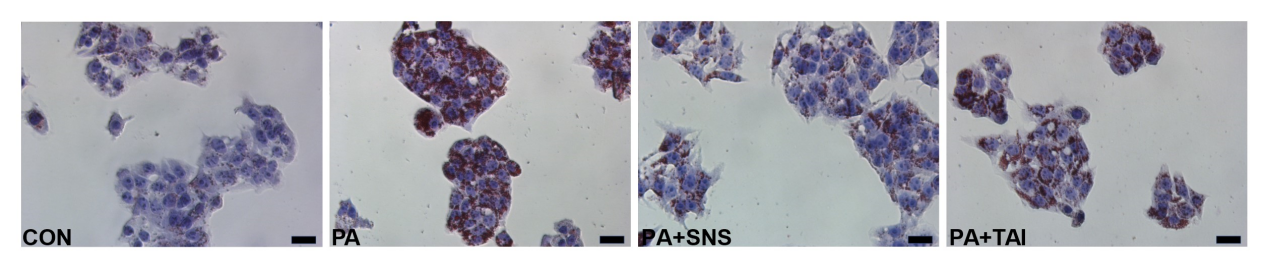


**Supplementary Figure 3** Effects of the mix of the three bioactive components (paeoniflorin, liquiritin and hesperidin) on PA-induced lipid deposition in HepG2 cell. Photos of HepG2 cells stained with Oil red O. Scale bar = 50 µm (magnification 400×). Cells were obtained from control group (CON), PA group (PA), PA + SNS medicated serum group (PA + SNS), and PA + three active ingredients group (PA + TAI).
